# Supplementary material for: Functional Promiscuity of Homologues of the Bacterial ArsA ATPases
Source: Hindawi journal article supplement (doi:10.1155/2010/187373), 2010-01-01
Supplement: f1 [file 187373.f1.pdf]

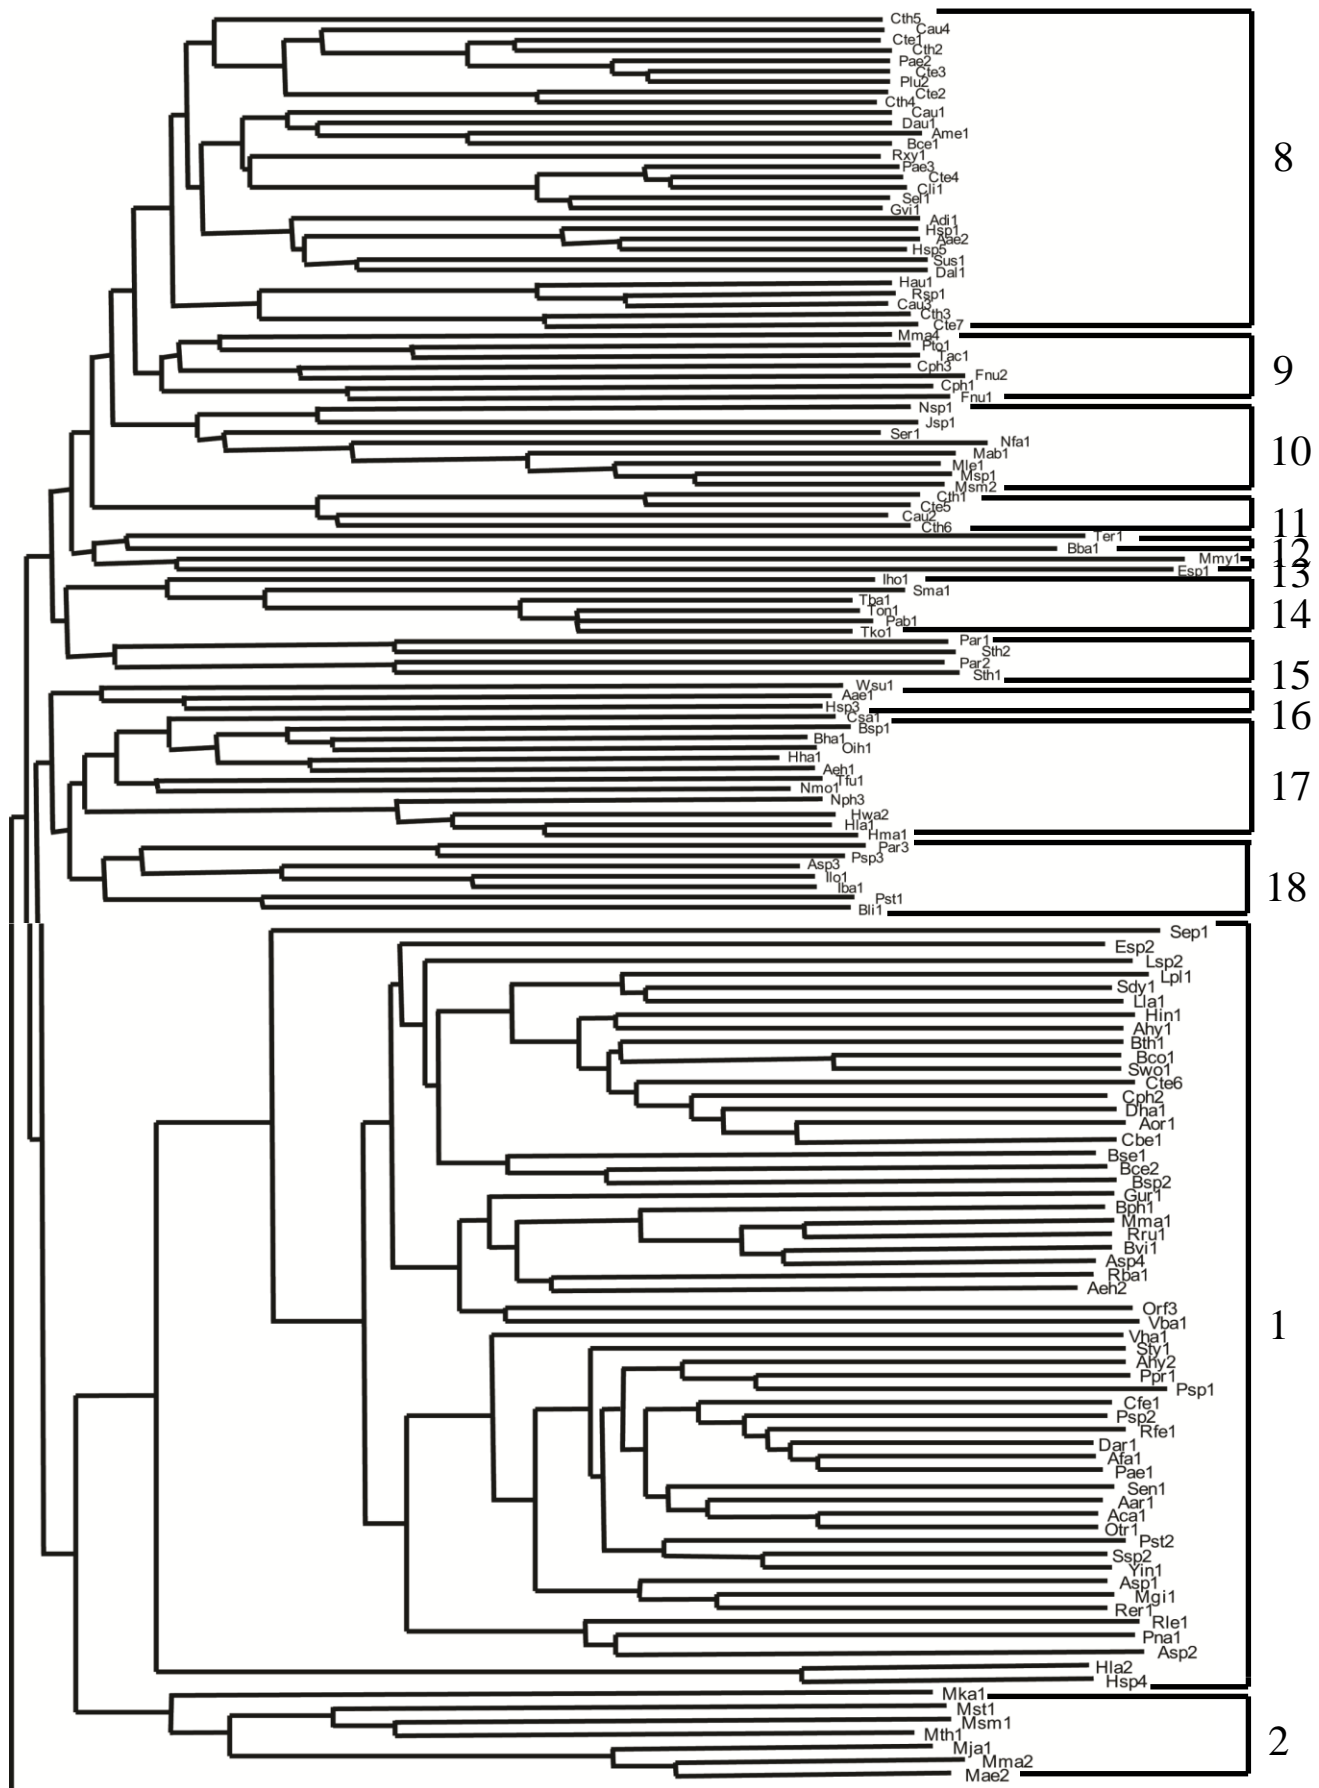

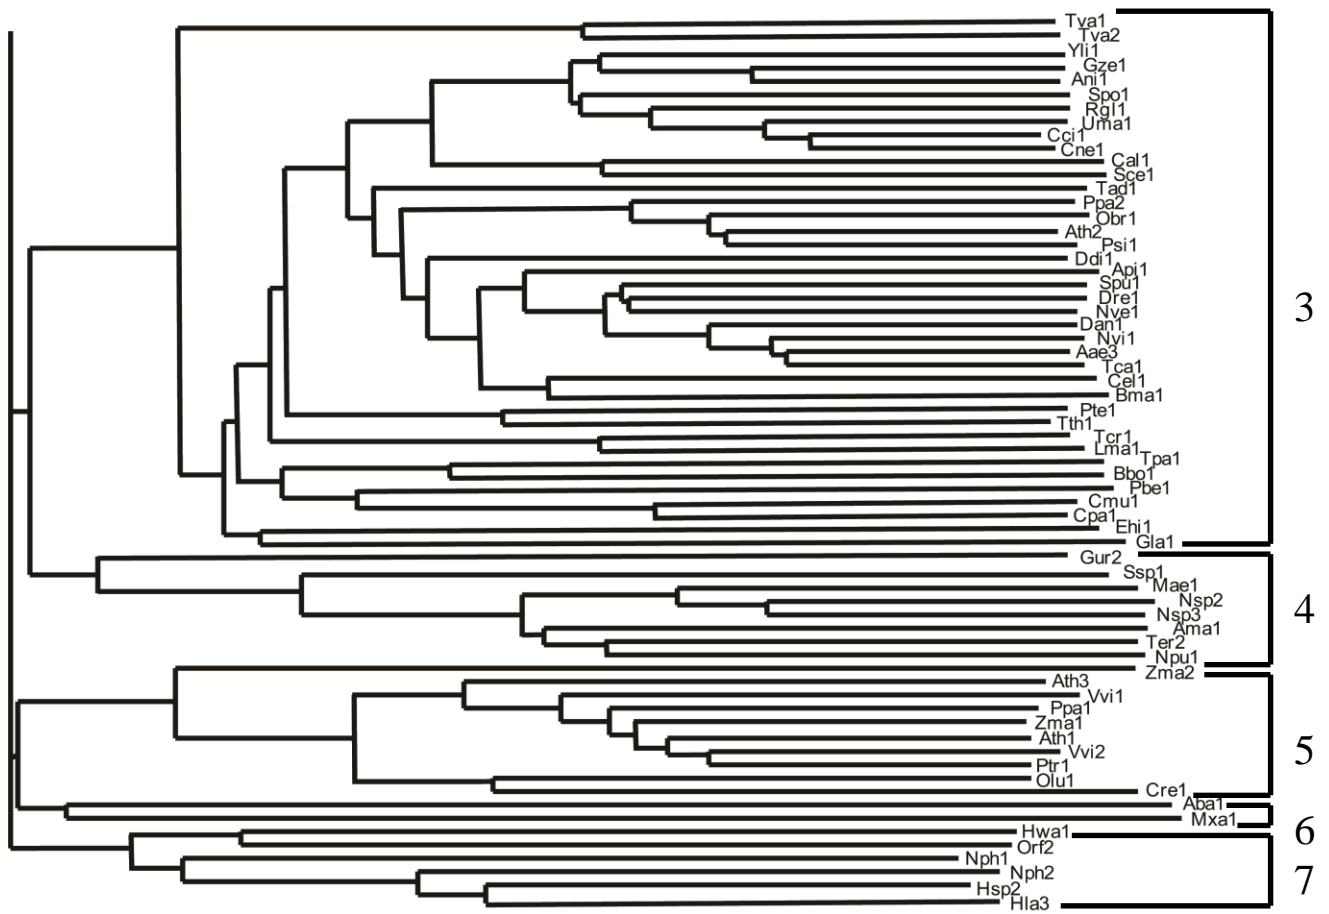

Figure S1: Dendrogram of the phylogenetic tree shown in Fig. 1. Proteins are arranged according to cluster and order within the cluster as seen in Fig. 1.

(A) ArsA

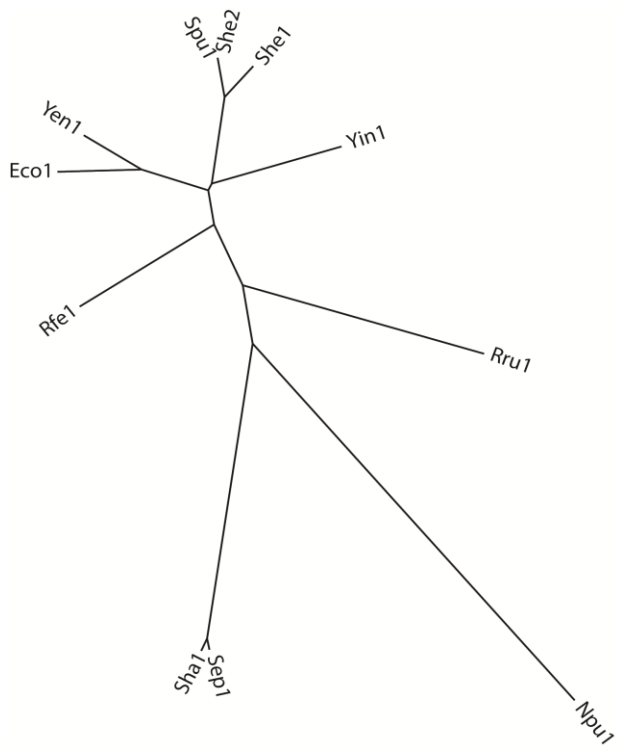

(B) ArsB

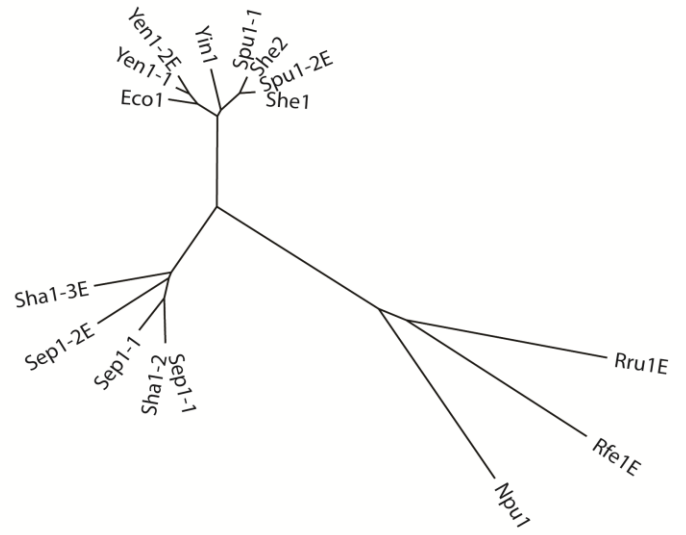

(C) ArsA

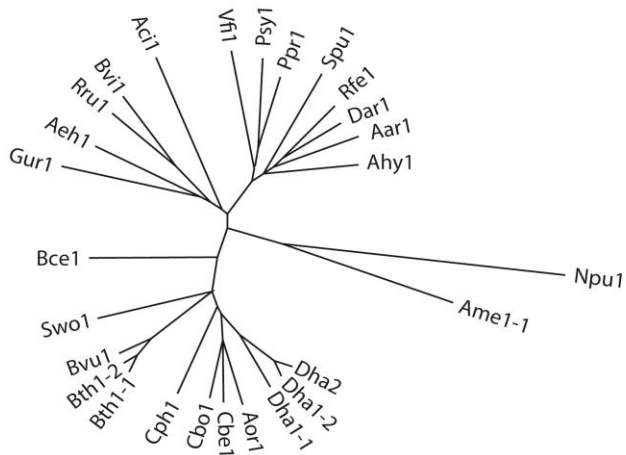

(D) Acr3

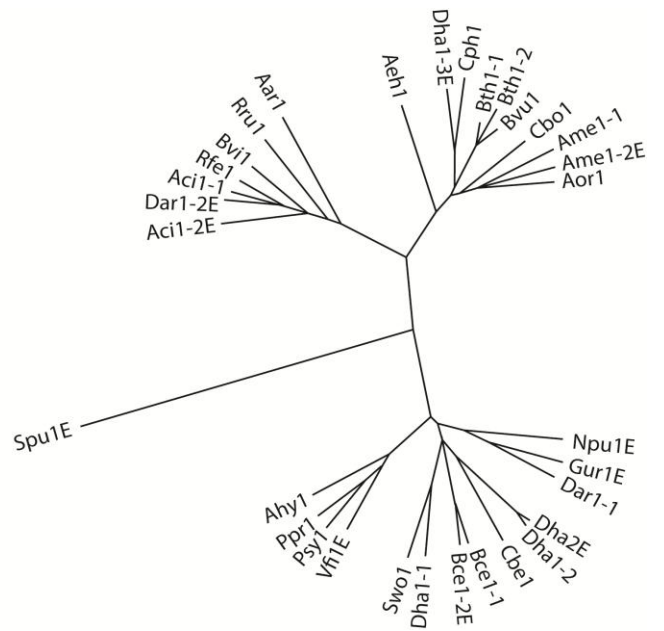

(E) ArsA

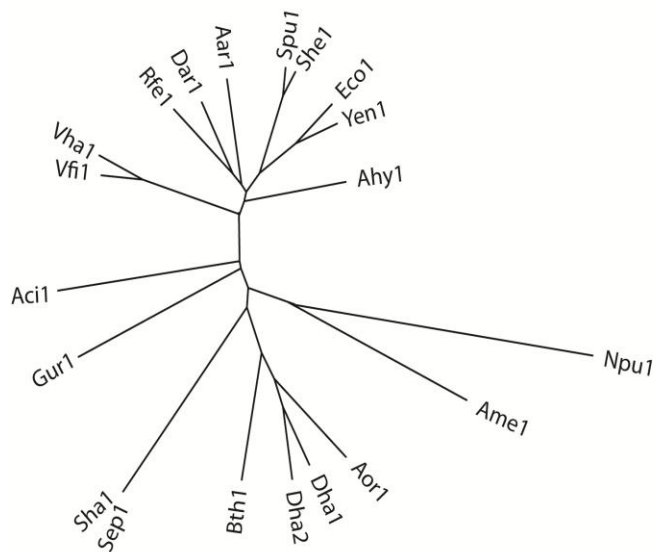

(F) ArsP

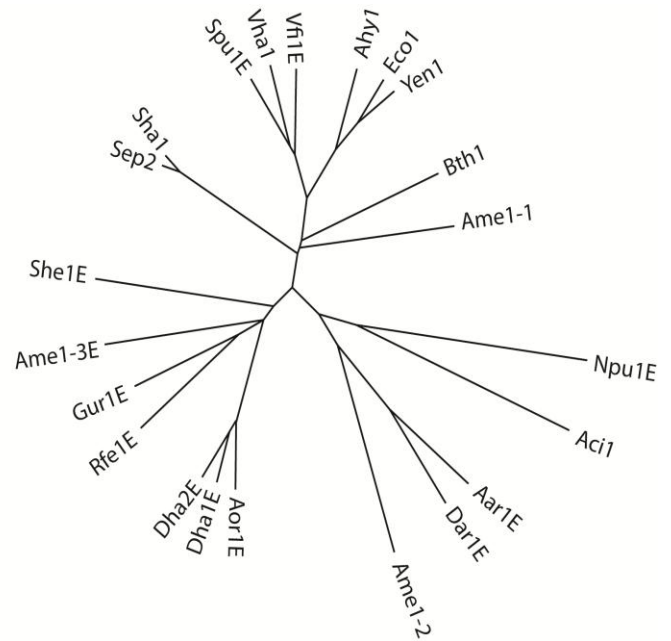

Figure S2: Phylogenetic trees showing the coevolution of (A) ArsA and (B) ArsB homologues, (C) ArsA and (D) Acr3 homologues, and (E) ArsA and (F) ArsP homologues, encoded within the same genomes. For these trees, we use the following system of nomenclature to better designate the added protein pairs not found within the same operons. The first digit indicates separate organisms with the same three letter code (ex: Aaa1, Aaa2), the second digit indicates paralogues, if present (ex: Aaa1-1, Aaa1-2). If the transporter is located within the same genome, but not the same operon as the *arsA*, the letter E, standing for elsewhere, follows the name (ex: Aaa1-3E).

(A) ArsA

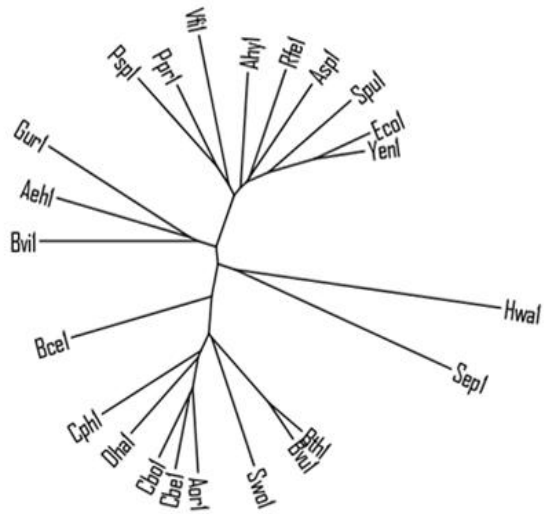

(B) ArsD

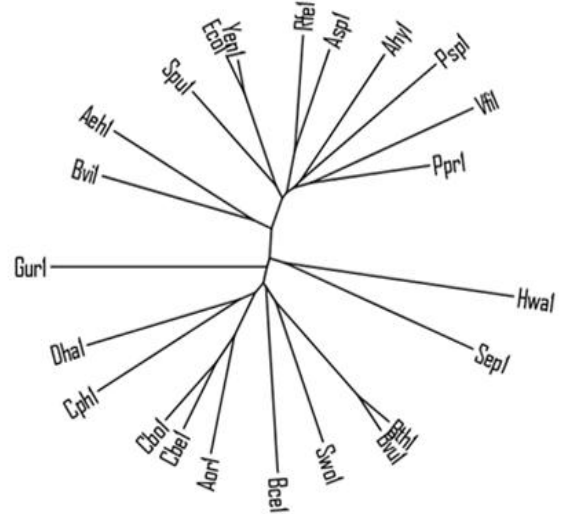

Figure S3: Phylogenetic trees showing the coevolution of (A) ArsA and (B) ArsD homologues encoded within the same operon. The methodology was as described in Fig. 1.
